# Supplementary material
Source: publisher site journal article supplement (https://www.dovepress.com/article/491627)
Supplement: Supplementary file 1 [file get_supplementary_file.php]

**Supplementary** **Table 1.** Laboratory Parameters Based on Acute Heart Failure Status

|  | **Acute Heart Failure** | | **p-values** |
| --- | --- | --- | --- |
|  | **No** (n=74) | **Yes** (n=72) |
| **Ferritin at diagnosis (ng/mL)** § | 1837.0 [48.0 – 84692.0] | 2707.0 [93.0 – 169766.0] | 0.473* |
| **Fibrinogen (mg/dL)** § | 361.0 [41.0 – 986.0] | 342.5 [38.0 – 1197.0] | 0.674* |
| **Sedimentation (mm/hour)** § | 58.0 [2.0 – 140.0] | 50.0 [1.0 – 140.0] | 0.795* |
| **NT-proBNP (pg/mL)** § | 1028.5 [12.0 – 70000.0] | 2716.0 [65.0 – 70000.0] | **0.033*** |
| **INR** § | 1.1 [0.8 – 2.6] | 1.1 [0.8 – 3.3] | 0.594* |
| **HDL-cholesterol (mg/dL)** § | 15.0 [4.0 – 55.0] | 13.0 [3.0 – 51.0] | 0.342* |
| **Triglyceride (mg/dL)** § | 205.0 [9.0 – 1313.0] | 248.0 [70.0 – 1020.0] | **0.043*** |
| **Albumin (g/dL)** † | 2.9 ± 0.7 | 2.7 ± 0.6 | 0.056** |
| **Urea (mg/dL)** § | 50.0 [11.0 – 223.0] | 51.5 [9.0 – 284.0] | 0.601* |
| **Creatinine (mg/dL)** § | 1.0 [0.2 – 12.1] | 1.0 [0.3 – 6.2] | 0.530* |
| **AST(U/L)** § | 47.5 [6.0 – 2501.0] | 54.5 [6.0 – 7435.0] | 0.260* |
| **LDH (U/L)** § | 368.0 [76.0 – 5476.0] | 498.5 [107.0 – 9026.0] | 0.058* |
| **Direct Bilirubin (mg/dL)** § | 0.4 [0.1 – 22.3] | 0.6 [0.1 – 7.6] | **0.049*** |
| **CRP (mg/L)** § | 7.8 [0.1 – 44.1] | 13.0 [0.0 – 99.1] | 0.050* |
| **Procalcitonin (ng/mL)** § | 1.0 [0.1 – 100.0] | 1.4 [0.1 – 100.0] | 0.266* |
| **Hemoglobin (g/dL)** § | 8.8 [5.6 – 18.3] | 9.2 [3.6 – 14.8] | 0.600* |
| **Platelet (cells/μL)** § | 74500.0 [7000.0 – 579000.0] | 87000.0 [3000.0 – 453000.0] | 0.573* |
| **Neutrophil (cells/μL)** § | 2550.0 [10.0 – 46010.0] | 3930.0 [30.0 – 33000.0] | 0.135* |
| **Lymphocyte (cells/μL)** § | 685.0 [70.0 – 3450.0] | 675.0 [30.0 – 6150.0] | 0.520* |
| **NLR** § | 4.7 [0.0 – 68.7] | 4.3 [0.0 – 138.0] | 0.620* |
| **MPV (fL)** † | 11.1 ± 1.3 | 11.5 ± 1.4 | 0.116** |

NT-proBNP: N-terminal pro-brain natriuretic peptide, INR: International Normalized Ratio, HDL: High-density lipoprotein, AST; aspartate aminotransferase, LDH: lactate dehydrogenase, CRP: C-reactive protein, NLR:  neutrophil-to-lymphocyte ratio, MPV: mean platelet volüme. The level of statistical significance was set at *p* ≤ 0.05 in bold.

†: Mean ± Standard Deviation, §: Median [Min.-Max.]

*. Mann-Whitney U test.

**. Independent Samples T-Test.
